# Supplementary material for: Increased MUC1 plus a larger quantity and complex size for MUC5AC in the peripheral airway lumen of long-term tobacco smokers
Source: Oxford University Press journal article supplement (doi:10.1042/cs20191085), 2020-05-01
Supplement: cs-2019-1085_supp.pdf [file cs-2019-1085_supp.pdf]

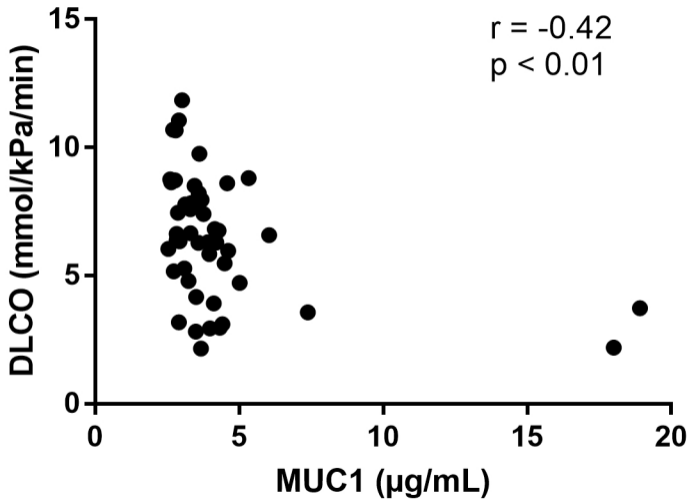

**Figure S1.** Association of MUC1 in bronchoalveolar lavage (BAL) fluid with DLCO for all study subjects in *Material 1*, including long-term smokers with (LTS+) and without (LTS-) COPD as well as healthy non-smokers (HNS). Analytical statistics are shown according to Spearman's rank order correlation.

**Table S1**

| Parameter [median (range)]       | Material 1        |                  |                  |
|----------------------------------|-------------------|------------------|------------------|
|                                  | HNS               | LTS-             | LTS+             |
| <b>A</b>                         |                   |                  |                  |
| Number of subjects               | 20                | 20               | 16               |
| Gender (M/F)                     | 14/6              | 10/10            | 5/11             |
| Age (years)                      | 54 (41-72)        | 54 (41-66)       | 62 (48-73)       |
| BMI                              | 21 (20-31)        | 24 (20-33)       | 24 (19-30)       |
| Current smoking (cigarettes/day) | 0 (0-0)           | 5 (5-20)         | 20 (2-35)        |
| Pack-years (years)               | 0 (0-0)           | 35 (5-60)        | 40 (30-60)       |
| FVC                              | 4.66 (2.74-7.72)  | 4.16 (2.8-7.3)   | 2.73 (1.39-5.33) |
| FVC (% predicted)                | 116 (85-157)      | 109 (86-146)     | 93 (63-128)      |
| FEV1                             | 3.58 (2.2-4.85)   | 3.03 (1.97-5.16) | 1.62 (0.94-3.06) |
| FEV1 (% predicted)               | 111 (75-142)      | 96 (72-120)      | 63 (43-91)       |
| FEV1/FVC                         | 76 (56-86)        | 72 (61-82)       | 55 (45-68)       |
| DLCO (mmol/kPa/min)              | 8,51 (5.85-11.84) | 6.65 (3.92-8.89) | 3.57 (2.19-7.59) |
| DLCO (% predicted)               | 90 (67-124)       | 75 (50-90)       | 45 (27-78)       |
|                                  |                   |                  |                  |
|                                  |                   | Material 2       |                  |
|                                  |                   | LTS-             | LTS+             |
| <b>B</b>                         |                   |                  |                  |
| Number of subjects               | 5                 | 9                | 4                |
| Gender (M/F)                     | 4/1               | 4/5              | 2/2              |
| Age (years)                      | 45 (41-66)        | 67 (45-72)       | 57 (52-64)       |
| BMI                              | 24 (22-29)        | 24 (22-26)       | 25 (19-30)       |
| Current smoking (cigarettes/day) | 0 (0-0)           | 10 (10-40)       | 14 (8-20)        |
| Pack-years (years)               | 0 (0-0)           | 38 (21-51)       | 32.5 (20-40)     |
| FVC                              | 5.7 (3.5-7.0)     | 3.2 (2.5-5.4)    | 4.4 (3.5-6.3)    |
| FVC (% predicted)                | 123 (109-127)     | 116 (74-125)     | 119 (97-130)     |
| FEV1                             | 4.7 (2.6-5.1)     | 2.4 (2.0-3.9)    | 2.9 (2.1-3.2)    |
| FEV1 (% predicted)               | 108 (100-127)     | 100 (68-116)     | 81 (75-105)      |
| FEV1/FVC                         | 74 (68-83)        | 73 (70-82)       | 61 (50-68)       |
| DLCO (mmol/kPa/min)              | 9.5 (6.0-10.2)    | 6.1 (4.8-8.9)    | 7.7 (5.6-10.0)   |
| DLCO (% predicted)               | 83 (68-115)       | 79 (62-88)       | 75 (70-98)       |

Footnote.

HNS = healthy non-smokers

LTS- = long-term smokers without COPD

LTS+ = long-term smoker with COPD

**Table S2**

| Material 2<br>Parameter, median (range) | Study group    |                |               |
|-----------------------------------------|----------------|----------------|---------------|
|                                         | HNS            | LTS-           | LTS+          |
| Number of subjects                      | 5              | 9              | 4             |
| Blood Neutrophil (million cell/mL)      | 2.85 (2.3-3.6) | 3.55 (2.8-6)   | 4.3 (2.7-4.6) |
| Blood Lymphocyte (million cell/ml)      | 1.8 (1.2-2.8)  | 2.05 (1.5-2.9) | 2.6 (1.8-3.2) |
| Blood Monocyte (million cell/mL)        | 0.4 (0.2-0.5)  | 0.45 (0.3-0.6) | 0.5 (0.3-0.7) |
| Blood Eosinophil (million cell/mL)      | 0.2 (0.1-0.4)  | 0.2 (0.1-0.4)  | 0.3 (0.1-0.6) |
| Blood Basophil (million cell/mL)        | 0 (0-0)        | 0 (0-0.1)      | 0.1 (0-0.1)   |

Footnote.

HNS = healthy non-smokers

LTS- = long-term smokers without COPD

LTS+ = long-term smoker with COPD
